# Supplementary material
Source: Springer Nature journal article supplement (https://www.springermedizin.de/resource/supplementary/12911_2009_328_MOESM4_ESM.pdf/9525488)

Predictive Factors

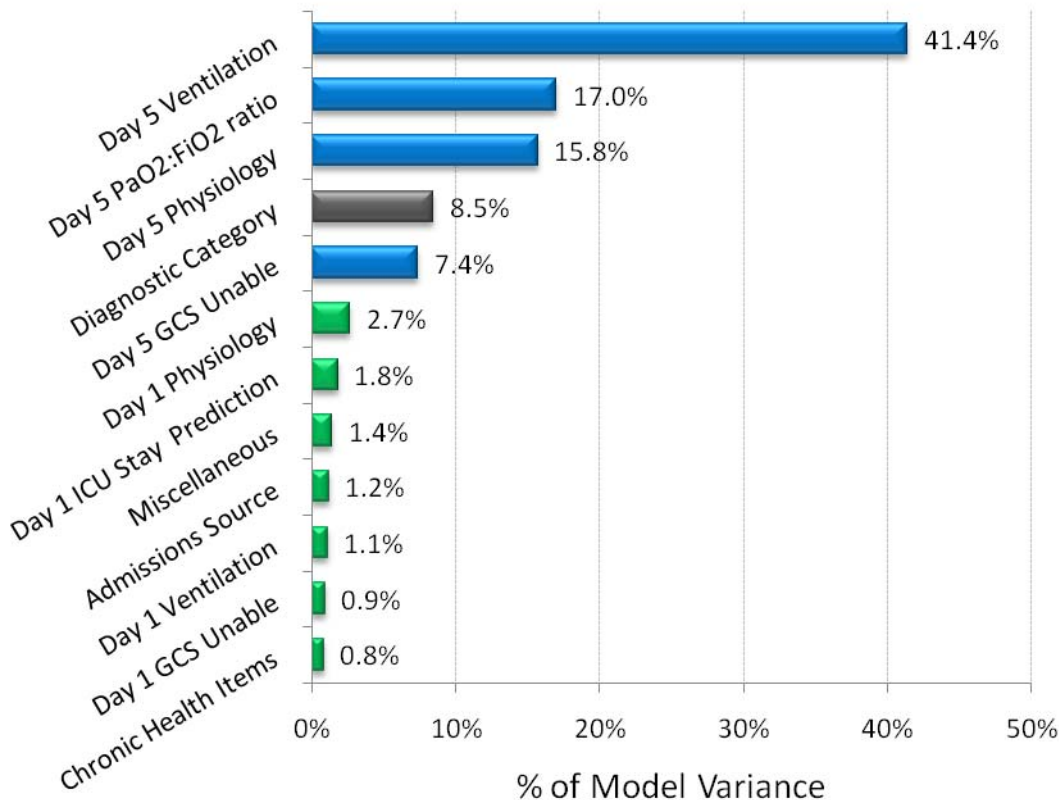

Supplement: MOESM4 [file 9525488]
